# Supplementary material
Source: PubMed Central journal article supplement (PMC7642071)
Supplement: AEM.01835-20-s0001.pdf [file AEM.01835-20-s0001.pdf]

## Supplemental material

### The heterotrophic bacterium *Cupriavidus pinatubonensis* JMP134 oxidizes sulfide to sulfate with thiosulfate as a key intermediate

Yufeng Xin<sup>1,2</sup>, Rui Gao<sup>1</sup>, Feifei Cui<sup>1</sup>, Chuanjuan Lü<sup>1</sup>, Honglei Liu<sup>1</sup>, Huaiwei Liu<sup>1</sup>, Yongzhen Xia<sup>1#</sup>, and Luying Xun<sup>1,3,#</sup>

<sup>1</sup> State Key Laboratory of Microbial Technology, Shandong University, Qingdao, 266237, P. R. China.

<sup>2</sup> College of Life Sciences, Qufu Normal University, Qufu, 273165, P. R. China.

<sup>3</sup> School of Molecular Biosciences, Washington State University, Pullman, WA 99164-7520, USA.

# For correspondence.

Yongzhen Xia, E-mail: xiayongzhen2002@sdu.edu.cn,

Luying Xun, E-mail: luying\_xun@vetmed.wsu.edu; Tel: +1 (509) 335-2787.

#### **This supplemental document contains:**

**Figure S1:** Sulfide oxidation by complementary strains of *C. pinatubonensis* JMP134 mutants.

**Figure S2:** The deletion of *sorA* does not affect sulfide oxidation to sulfate.

**Figure S3:** SorA is responsible for the oxidation of added sulfite.

**Figure S4:** Thiosulfate-induced  $\Delta$ *sorA* cells also oxidized sulfite to sulfate.

**Table S1:** Sulfur-oxidizing enzymes in *C. pinatubonensis* JMP134.

**Table S2:** Sulfur-oxidizing enzymes in GB17, OCh 114, and DSS-3.

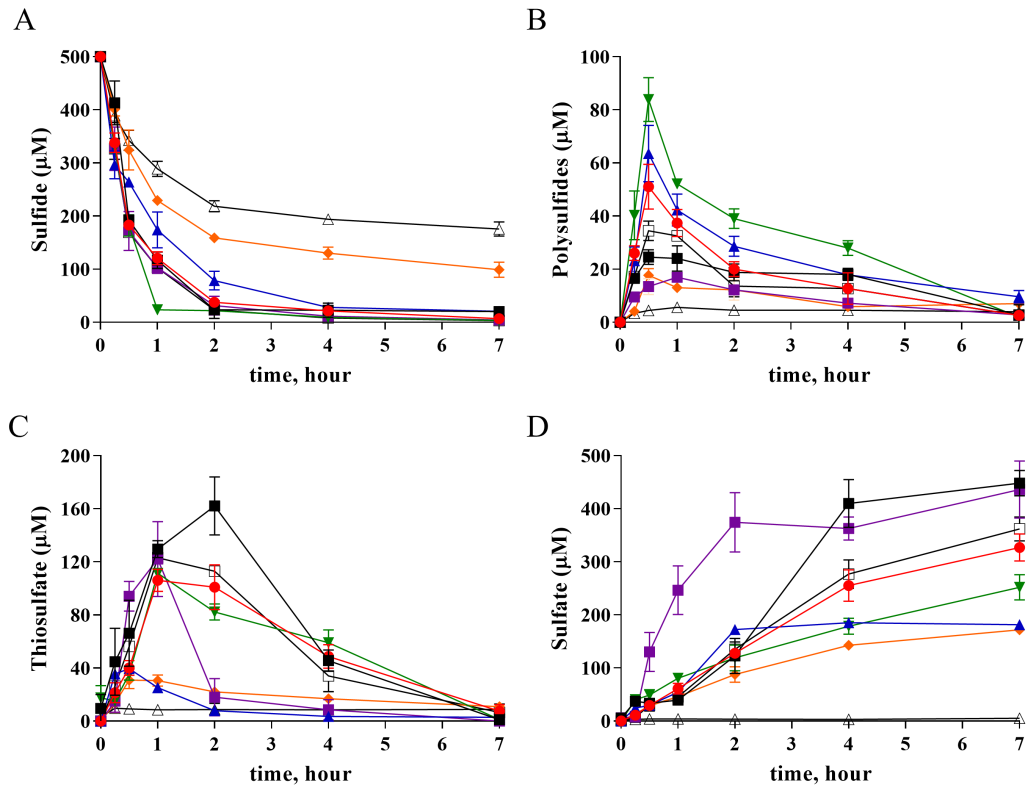

**Fig. S1. Sulfide oxidation by complemented strains of *C. pinatubonensis* JMP134 mutants.** Cells were harvested, washed, and re-suspended at  $OD_{600}$  of 2.0 in 100 mM HEPES buffer, pH 7.4. Sulfide was added to 500  $\mu$ M to initiate the reaction. Sulfide, polysulfides, thiosulfate, and sulfate were determined at different times. *C. pinatubonensis* JMP134 ( $\square$ ),  $\Delta$ *soxYZ*::*soxYZ* ( $\blacksquare$ ),  $\Delta$ *pdo1pdo2*::*pdo2* ( $\bullet$ ),  $\Delta$ *pdo1pdo2soxYZ*::*soxYZ* ( $\blacktriangle$ ),  $\Delta$ *fccB*::*fccB* ( $\blacktriangledown$ ),  $\Delta$ *sqrpdo1pdo2soxYZ*::*soxYZ* ( $\blacklozenge$ ),  $\Delta$ *sqrpdo1pdo2*::*sqrpdo2* ( $\blacksquare$ ), and HEPES buffer ( $\triangle$ ). All data are average of at least three samples with standard deviation (error bar).

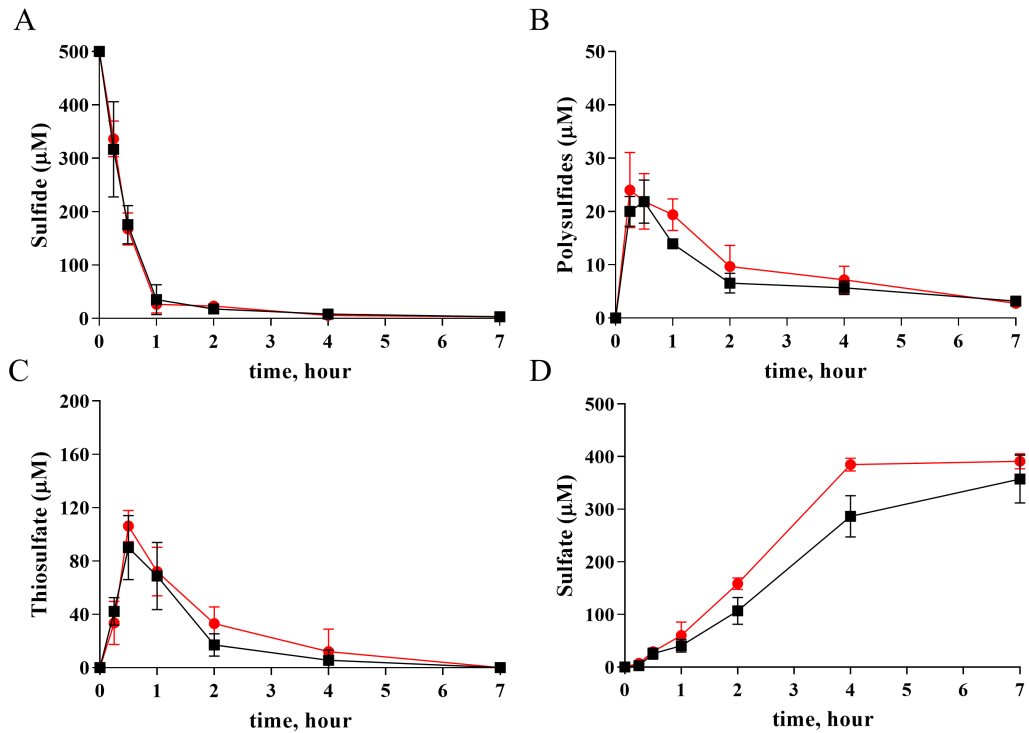

**Fig. S2. The deletion of *sorA* does not affect sulfide oxidation to sulfate.**

Cells were harvested, washed, and re-suspended at  $OD_{600}$  of 2.0 in 100 mM HEPES

buffer, pH 7.4. Sulfide was added to 500  $\mu\text{M}$  to initiate the reaction. Sulfide (A),

polysulfides (B), thiosulfate (C), and sulfate (D) in cell suspensions of  $\Delta sorA$

(■) and  $\Delta sorA::sorA$  (●) were determined at different times. All data are average of at

least three samples with standard deviation (error bar).

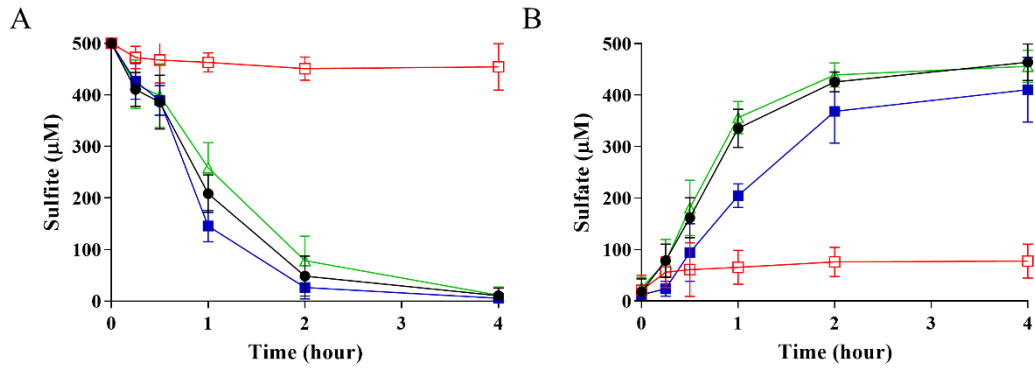

**Fig. S3. SorA is responsible for the oxidation of added sulfite.** Sulfite-induced cells were harvested, washed, and re-suspended at  $OD_{600}$  of 2.0 in 100 mM HEPES buffer, pH 7.4. Sulfite was added to 500  $\mu\text{M}$  to initiate the reaction. Sulfite (A) and sulfate (B) in cell suspensions of *C. pinatubonensis* JMP134 wild type (●),  $\Delta sorA$  (□),  $\Delta sorA::sorA$  (■), and  $\Delta soxYZ$  (△) were determined at different times. All data are average of at least three samples with standard deviation (error bar).

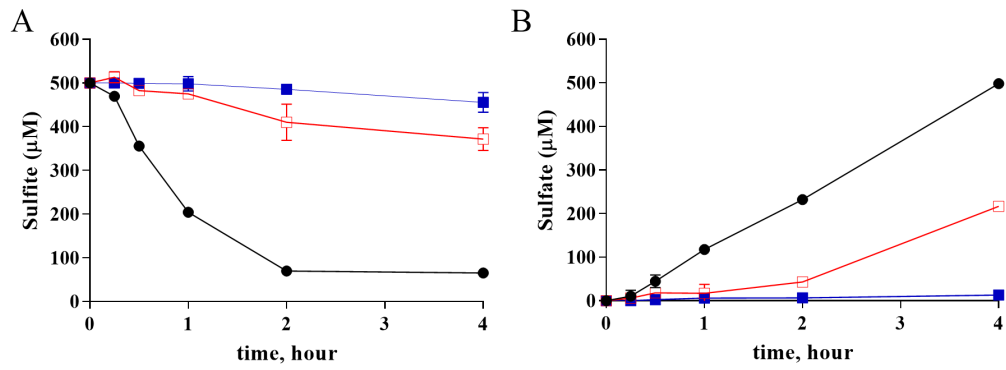

**Fig. S4. Thiosulfate-induced  $\Delta\text{sorA}$  cells slowly oxidized sulfite to sulfate.** Cells were harvested, washed, and re-suspended at  $OD_{600}$  of 2.0 in 100 mM HEPES buffer, pH 7.4. Sulfite was added to 500  $\mu\text{M}$  to initiate the reaction. Sulfite (A) and sulfate (B) of in cell suspensions of *C. pinatubonensis* JMP134 wild type (●),  $\Delta\text{sorA}$  (□), and  $\Delta\text{sorAsoxYZ}$  (■) were determined at different times. All data are average of at least three samples with standard deviation (error bar).

**Table S1.** Sulfur-oxidizing enzymes in *C. pinatubonensis* JMP134

| <b>Locus_tag</b> | <b>Accession Number</b> | <b>Protein</b> | <b>Size (aa)</b> | <b>Putative function</b>                             |
|------------------|-------------------------|----------------|------------------|------------------------------------------------------|
| Reut_B3588       | AAZ62946                | SQR            | 558              | sulfide dehydrogenase                                |
| Reut_B3589       | AAZ62947                | PDO2           | 298              | persulfide dioxygenase                               |
| Reut_B3590       | AAZ62948                | FisR           | 436              | transcriptional regulator                            |
| Reut_B3591       | AAZ62949                | TauE           | 273              | sulfite exporter                                     |
| Reut_A3082       | AAZ62442                | SorB           | 208              | sulfite:cytochrome <i>c</i> oxidoreductase subunit B |
| Reut_A3083       | AAZ62443                | SorA           | 417              | SO family, molybdopterin binding domain              |
| Reut_A3249       | AAZ62608                | SoxB           | 573              | sulfate thio-hydrolase                               |
| Reut_A3250       | AAZ62609                | TlpA_like      | 165              | disulfide reductases in cytochrome maturation        |
| Reut_A3251       | AAZ62610                | SoxX           | 224              | monoheme subunit cytochrome                          |
| Reut_A3252       | AAZ62611                | SoxA           | 275              | diheme subunit cytochrome                            |
| Reut_A3253       | AAZ62612                | DsrE-like      | 152              | Proposed thiosulfate transfer                        |
| Reut_A3254       | AAZ62613                | SoxZ           | 103              | sulfur compound chelating protein                    |
| Reut_A3255       | AAZ62614                | SoxY           | 151              | sulfur covalently binding protein                    |
| Reut_A3256       | AAZ62615                | cyt <i>c</i>   | 108              | cytochrome <i>c</i>                                  |
| Reut_A3257       | AAZ62616                | SoxD           | 344              | diheme <i>c</i> -type cytochrome                     |
| Reut_A3258       | AAZ62617                | SoxC           | 449              | molybdenum cofactor-containing subunit               |
| Reut_A3259       | AAZ62618                | ArsR           | 138              | transcriptional regulator                            |
| Reut_A3260       | AAZ62619                | EamA-like      | 297              | O-acetylserine/cysteine export protein               |
| Reut_A3261       | AAZ62620                | FccB           | 419              | monomeric flavoprotein                               |
| Reut_A3262       | AAZ62621                | Cyt <i>c</i>   | 108              | cytochrome <i>c</i> <sub>553</sub>                   |
| Reut_A3334       | AAZ62692                | PDO1           | 245              | persulfide dioxygenase                               |

**Table S2.** Sulfur-oxidizing enzymes in GB17, OCh 114, and DSS-3<sup>a</sup>

| Enzymes          | GB17                      | OCh 114      | DSS-3        |
|------------------|---------------------------|--------------|--------------|
| SQR              | QFG36295/36% <sup>b</sup> | ABG30463/67% | AAV94899/39% |
| PDO <sup>c</sup> | QFG35975/51%              | ABG30464/57% | AAV94334/59% |
|                  | QFG36611/51%              | ABG30238/56% |              |
| SoxX             | QFG36009/31%              | ABG31144/31% | AAV94297/52% |
| SoxY             | QFG35251/40%              | ABG31145/37% | AAV94298/37% |
| SoxZ             | QFG35250/37%              | ABG31146/33% | AAV94299/33% |
| SoxA             | QFG35249/27%              | ABG31147/26% | AAV94300/26% |
| SoxB             | QFG35248/49%              | ABG31148/48% | AAV94301/49% |
| SoxC             | QFG35247/51%              | ABG31149/50% | AAV94302/50% |
| SoxD             | QFG35246/34%              | ABG31150/31% | AAV94303/34% |
| FccA (SoxE)      | QFG35245/40%              | ABG31151/36% | AAV94304/37% |
| FccB (SoxF)      | QFG35244/41%              | ABG31152/38% | AAV94305/42% |

<sup>a</sup> Use the enzymes in *C. pinatubonensis* JMP134 (Table S1) as the query sequences. <sup>b</sup> Percentage of identities with the query protein. <sup>c</sup> PDO2 (AAZ62947) of *C. pinatubonensis* JMP134. The strains are *P. pantotrophus* GB17, *Roseobacter denitrificans* OCh 114, and *Ruegeria pomeroyi* DSS-3.
